# Supplementary material for: Overexpression of a MYB Family Gene, OsMYB6, Increases Drought and Salinity Stress Tolerance in Transgenic Rice
Source: Front Plant Sci. 2019 Feb 18;10:168. doi: 10.3389/fpls.2019.00168 (PMC6387972; doi:10.3389/fpls.2019.00168)
Supplement: Supplementary file 1 [file Table_1.XLSX]

## Sheet: Sheet1
Table S1. Primers used in this study
Genes	Accession No. in GenBank	Forward (5`→3`)	Reverse (5`→3`)	Restriction sites
Gene cloning
OsMYB6	MK061534	GGGGTACC CCATGTCCGCGTCTGCAT	GCTCTAGA GAACTGTAGTATTCAAAGCCCTCA	Kpn I/ Xba I
Subcellular Localization
OsMYB6	MK061534	CGGAATTC CCATGTCCGCGTCTGCAT	GGGGTACC TCCATGAGATGTTGGTGGC	EcoR I/Kpn I
PCR
Hyg	XP_003071652	CTCCATACAAGCCAACCACG	AAAAAGCCTGAACTCACCGC
qRT-PCR
OsMYB6	MK061534	TCTTGTGTCCGCAGTTGGC	ATGGGGTAGGGCATTGGAG
OsLEA3	Os05g0542500	CGGCAGCGTCCTCCAAC	CGGTCATCCCCAGCGTG
OsP5CS	Os05g0455500	CTCAAATCAAGGCGTCAACTAAGA	TTTGTCAATATATACGTGGCATATACCA
OsCATA	Os02g0115700	GCCGGATAGACAGGAGAGGT	TCTTCACATGCTTGGCTTCA
SNAC1	Os03g0815100	GTCAAGACTGATTGGATCATGC	CCAATCATCCAACCTGAGAGA
OsDREB1A	Os09g0522200	TGGAGCTACTAGAGCTCAATCAACTG	TGGCATCGGAAGCCAGAA
OsDREB2A	Os01g0165000	GGAATCTCCTCCTTTCATCGTG	TTCCGCTCCTGACAAACACG
OsUbiquitin	Os06g0681400	TTCCATGCTGCTCTACCACAG	AGGGTTCACAAGTCTGCCTATT
